# Supplementary material for: Acetylation and phosphorylation control both local and global stability of the chloroplast F1 ATP synthase
Source: PubMed Central journal article supplement (PMC5343439; doi:10.1038/srep44068), 2017-03-09
Supplement: srep44068-s1.pdf [file srep44068-s1.pdf]

## Supplementary Information

### Acetylation and phosphorylation control both local and global stability of the chloroplast F<sub>1</sub> ATP synthase

Carla Schmidt<sup>1,3\*</sup>, Victoria Beilsten-Edmands<sup>1</sup>, Shabaz Mohammed<sup>1,2</sup>, and Carol V.  
Robinson<sup>1,\*</sup>

<sup>1</sup> Department of Chemistry, University of Oxford, Oxford, United Kingdom.

<sup>2</sup> Department of Biochemistry, University of Oxford, Oxford, United Kingdom.

<sup>3</sup> present address: HALOmem, Martin Luther University Halle-Wittenberg, Kurt-Mothes-Str.  
3, 06120 Halle, Germany.

\*correspondence:

carla.schmidt@biochemtech.uni-halle.de and carol.robinson@chem.ox.ac.uk

## Tables

**Table S1: PTMs identified in the cATPase.** The protein subunit, the modified residue, the type of PTM, the identified peptide sequence and the highest observed Mascot and MaxQuant score are given. It is indicated if the respective PTMs were identified before. Note that some modified sites could not unambiguously be assigned.

| Subunit  | Site        | PTM                     | Peptide sequence                       | max Mascot score | max MaxQuant score | identified previously |
|----------|-------------|-------------------------|----------------------------------------|------------------|--------------------|-----------------------|
| $\alpha$ | N-Term      | acetylation             | *ATIRADEISK                            | 57               | 137                | Schmidt et al.        |
|          | N-Term      | acetylation             | *ATIRADEISKIIR                         | 59               |                    |                       |
|          | K25         | acetylation             | EVKVVNTGTVLQVGDGIAR                    | 78               | 99                 |                       |
|          | K114        | acetylation             | VINALAKPIDGRGEITASESR                  | 19               | 42                 |                       |
|          | K114        | acetylation             | VINALAKPIDGR                           | 52               |                    |                       |
|          | T181/183    | phosphorylation         | TAVATDTILNQGGQNVICVYVAIGQK             | 168              | 133                |                       |
|          | K266        | acetylation             | HTLIIYDDLKQAQAYR                       | 42               | 95                 |                       |
|          | K374        | acetylation             | VGSAAQIKAMK                            | 66               | 59                 |                       |
|          | K384        | acetylation             | LKLELAQFAELEAFAQFASDLKATQNQLAR         |                  | 239                |                       |
|          | K422        | acetylation             | ELLKQPQSAPLTVEEQVMTIYTGTNGYLDSLELDQVR  | 17               | 63                 |                       |
|          | K422        | acetylation             | ELLKQPQSAPLTVEEQVMTIYTGTNGYLDSLELDQVRK | 40               | 68                 |                       |
|          | Y445        | phosphorylation         | QPQSAPLTVEEQVMTIYTGTNGYLDSLELDQVR      |                  | 40                 |                       |
|          | K456        | acetylation             | KYLVLR                                 | 43               | 101                |                       |
|          | K466        | acetylation             | TYVKTNKPEFQEISSTK                      | 60               | 70                 |                       |
|          | K469        | acetylation             | TYVKTNKPEFQEISSTK                      | 49               | 61                 |                       |
| K469     | acetylation | TNKPEFQEISSTK           | 72                                     | 75               |                    |                       |
| K480     | acetylation | TNKPEFQEISSTKTFTEEAELLK | 31                                     |                  |                    |                       |
| $\beta$  | N-Term      | acetylation             | *MRINPTTSDPGVSTLEK                     | 74               | 125                |                       |
|          | N-Term      | acetylation             | *MRINPTTSDPGVSTLEKK                    | 54               | 86                 |                       |
|          | K17         | acetylation             | INPTTSDPGVSTLEKK                       |                  | 66                 |                       |
|          | K18         | acetylation             | INPTTSDPGVSTLEKK                       | 100              |                    |                       |
|          | K50         | acetylation             | MPNIYNALIVK                            | 50               |                    |                       |

|            |             |                                     |                                                                           |     |     |                |
|------------|-------------|-------------------------------------|---------------------------------------------------------------------------|-----|-----|----------------|
| $\beta$    | T54         | phosphorylation                     | D <b>T</b> AGQPMNVTCEVQQLLGNNR                                            | 106 | 101 | Schmidt et al. |
|            | T54         | phosphorylation                     | GRD <b>T</b> AGQPMNVTCEVQQLLGNNR                                          | 69  | 144 | Schmidt et al. |
|            | T54         | phosphorylation                     | D <b>T</b> AGQPMNVTCEVQQLLGNNRVR                                          |     | 93  |                |
|            | T62         | phosphorylation                     | DTAGQPMN <b>V</b> TCEVQQLLGNNR                                            | 62  | 100 |                |
|            | T62         | phosphorylation                     | GRDTAGQPMN <b>V</b> TCEVQQLLGNNR                                          | 64  |     |                |
|            | K145        | acetylation                         | SAPAF <b>T</b> QLDT <b>K</b> LSIFETGIK                                    | 38  |     |                |
|            | K217        | acetylation                         | TREGNDLYMEM <b>K</b> ESGVINEQNI <b>A</b> ESK                              |     | 90  |                |
|            | K359        | acetylation                         | GLAA <b>K</b> GIYPAVDPLD <b>S</b> TSTMLQPR                                | 52  |     |                |
|            | K392        | acetylation                         | <b>V</b> K <b>E</b> TLQR                                                  | 43  | 85  | Schmidt et al. |
|            | K399        | acetylation                         | <b>Y</b> <b>K</b> ELQDIIAILGLDELSEEDRLT <b>V</b> AR                       |     | 215 |                |
| $\gamma$   | K55         | acetylation                         | DRIG <b>S</b> V <b>K</b>                                                  | 25  |     |                |
|            | K65         | acetylation                         | ITEAM <b>K</b> L <b>V</b> AAAK                                            |     | 49  |                |
|            | K71         | acetylation                         | L <b>V</b> AAAK <b>V</b> R                                                | 36  | 59  |                |
|            | K117        | acetylation                         | <b>K</b> VALMVVTGDR                                                       | 66  | 47  |                |
|            | K150        | acetylation                         | <b>K</b> LGVDYTIISIG <b>K</b>                                             | 87  | 122 | Schmidt et al. |
|            | K150        | acetylation                         | <b>K</b> LGVDYTIISIG <b>K</b> <b>K</b>                                    | 88  | 155 | Schmidt et al. |
|            | K162/163    | acetylation                         | <b>K</b> LGVDYTIISIG <b>K</b> <b>K</b>                                    | 54  |     |                |
|            | K163        | acetylation                         | <b>K</b> GNTYFIR                                                          | 46  | 110 |                |
|            | S223        | phosphorylation                     | <b>S</b> DPVIHTLLPL <b>S</b> PK                                           | 60  | 66  |                |
|            | S234        | phosphorylation                     | <b>S</b> DPVIHTLLPL <b>S</b> PK                                           | 48  | 88  |                |
| K335       | acetylation | <b>K</b> TL <b>S</b> IN <b>Y</b> NR | 70                                                                        | 172 |     |                |
| $\delta$   | S97         | phosphorylation                     | YASALADVADVTGTLEAT <b>N</b> SD <b>V</b> E <b>K</b>                        | 153 | 228 | Schmidt et al. |
|            | K101        | acetylation                         | YASALADVADVTGTLEAT <b>N</b> SD <b>V</b> E <b>K</b> LR                     |     | 44  |                |
|            | T175        | phosphorylation                     | ITG <b>T</b> EVAVVTSV <b>V</b> KLENDHLA <b>Q</b> IA <b>K</b>              | 82  |     |                |
|            | K196        | acetylation                         | LENDHLA <b>Q</b> IA <b>K</b> GV <b>Q</b> K                                | 37  | 96  |                |
|            | S216        | phosphorylation                     | IK <b>T</b> VID <b>P</b> SLVAGFTIR <b>Y</b> GN <b>E</b> G <b>S</b> K      | 64  |     |                |
| $\epsilon$ | N-Term      | acetylation                         | <b>*</b> TLNLCVLT <b>P</b> NR                                             | 80  | 170 |                |
|            | N-Term      | acetylation                         | <b>*</b> TLNLCVLT <b>P</b> NR <b>S</b> I <b>W</b> N <b>S</b> E <b>V</b> K |     | 136 |                |
|            | T2          | phosphorylation                     | <b>T</b> L <b>N</b> L <b>C</b> V <b>L</b> T <b>P</b> NR                   | 68  |     |                |

|      |                 |                          |                           |     |                |                                                    |
|------|-----------------|--------------------------|---------------------------|-----|----------------|----------------------------------------------------|
| ε    | S85             | phosphorylation          | GSDIDPQEAQQTLEIAEANLR     | 103 | 82             | Schmidt et al.<br>Schmidt et al.<br>Schmidt et al. |
|      | K112            | acetylation              | QKIEANLALR                | 57  | 105            |                                                    |
|      | K112            | acetylation              | RQKIEANLALR               | 20  | 106            |                                                    |
|      | K112            | acetylation              | QKIEANLALRR               | 57  | 73             |                                                    |
| I    | K73             | acetylation              | GKAIEQLEK                 | 49  | 89             | Schmidt et al.<br>Schmidt et al.                   |
|      | K86/87          | acetylation              | LKKVEMDADQFR              |     | 54             |                                                    |
|      | K87             | acetylation              | KVEMDADQFR                | 82  | 103            |                                                    |
|      | K87             | acetylation              | KVEMDADQFRVNGYSEIER       | 79  | 60             |                                                    |
|      | K107            | acetylation              | EKMNLINSTYK               | 78  | 94             |                                                    |
|      | K125            | acetylation              | TLEQFENYKNETIQFEQQK       | 41  | 116            |                                                    |
|      | K135            | acetylation              | TLEQFENYKNETIQFEQQKAINQVR | 96  | 94             |                                                    |
| T155 | phosphorylation | VFQQALQGALGTLNSCLNNELHLR | 73                        | 147 | Schmidt et al. |                                                    |
| II   | K124            | acetylation              | DASIKEQLSGVK              | 75  | 106            | Schmidt et al.                                     |
|      | K124            | acetylation              | DASIKEQLSGVKDTSSEVK       | 63  | 112            |                                                    |
|      | K131            | acetylation              | EQLSGVKDTSSEVK            | 67  | 125            |                                                    |
|      | K164            | acetylation              | KETQLEVEAK                |     | 86             |                                                    |
|      | K173            | acetylation              | KETQLEVEAKLAEGR           |     | 63             |                                                    |
|      | K138            | acetylation              | DTSSEVKQLEEQANAVMR        | 83  |                |                                                    |
|      | K161            | acetylation              | AEISAALNKMK               |     | 52             |                                                    |
|      | K163            | acetylation              | AEISAALNKMK               | 64  |                |                                                    |
|      | K173            | acetylation              | ETQLEVEAKLAEGR            | 58  |                |                                                    |
|      | K180            | acetylation              | KKIEVELQEALGSLEQQKEDTIK   | 73  |                |                                                    |
|      | K180            | acetylation              | KIEVELQEALGSLEQQKEDTIK    | 40  | 135            |                                                    |
|      | S205            | phosphorylation          | SLDSQISALSDDIVKK          |     | 44             |                                                    |
|      | S205            | phosphorylation          | SLDSQISALSDDIVKK          | 70  | 98             |                                                    |
| S208 | phosphorylation | SLDSQISALSDDIVKK         | 62                        |     |                |                                                    |
| IV   | K156            | acetylation              | KGLGYFGK                  | 46  | 130            |                                                    |

**Table S2: Comparative cross-linking of naturally modified and deacetylated chloroplast ATP synthase.** The cross-linked protein subunits, the cross-linked residues, the number of obtained spectra and the ratio of naturally modified (d0) versus deacetylated (d4) chloroplast ATP synthase are given. Changes in protein interactions > 2-fold are highlighted in grey.

| Protein 1     | Protein 2     | Residue 1 | Residue 2 | # spectra | d0/d4  |
|---------------|---------------|-----------|-----------|-----------|--------|
| $\alpha$      | $\alpha$      | 11        | 25        | 7         | 0.94   |
|               |               | 11        | 114       | 1         | 0.32   |
|               |               | 11        | 466       | 1         | 1.21   |
|               |               | 25        | 114       | 4         | 1.76   |
|               |               | 374       | 378       | 3         | 1.09   |
|               |               | 378       | 384       | 1         | 0.86   |
|               |               | 456       | 466       | 1         | 1.31   |
|               |               | 456       | 469       | 1         | 0.56   |
|               |               | 456       | 491       | 2         | 0.92   |
|               |               | 469       | 491       | 1         | 0.64   |
| $\alpha$      | $\beta$       | 11        | 17        | 1         | 1.71   |
|               |               | 11        | 392       | 4         | 1.40   |
|               |               | 374       | 426       | 1         | 1.17   |
|               |               | 382       | 495       | 1         | 0.77   |
|               |               | 456       | 359       | 3         | 1.04   |
|               |               | 469       | 359       | 1         | 1.33   |
| $\alpha$      | $\delta$      | 2         | 101       | 8         | 0.99   |
| $\alpha$      | I             | 2         | 125       | 6         | 0.67   |
|               |               | 114       | 135       | 15        | 0.68   |
|               |               | 466       | 116       | 1         | 0.71   |
| $\alpha$      | II            | 456       | 164       | 1         | 0.59   |
| $\beta$       | $\beta$       | 18        | 50        | 11        | 1.10   |
|               |               | 359       | 392       | 3         | 0.74   |
|               |               | 359       | 399       | 4         | 0.52   |
|               |               | 359       | 426       | 2         | 0.73   |
|               |               | 392       | 399       | 3         | 0.44   |
|               |               | 392       | 426       | 5         | 1.52   |
| $\beta$       | $\delta$      | 18        | 205       | 3         | 1.09   |
|               |               | 359       | 210       | 1         | 1.38   |
| $\beta$       | $\gamma$      | 359       | 55        | 1         | 1.05   |
|               |               | 392       | 55        | 2         | 2.00   |
|               |               | 426       | 71        | 2         | 1.20   |
|               |               | 426       | 149       | 1         | 0.91   |
| $\beta$       | I             | 426       | 80        | 1         | 1.02   |
| $\beta$       | II            | 426       | 131       | 1         | 2.56   |
| $\delta$      | $\delta$      | 210       | 231       | 1         | 1.33   |
| $\varepsilon$ | $\varepsilon$ | 2         | 20        | 2         | 7.17   |
|               |               | 105       | 112       | 2         | 204.21 |
| $\varepsilon$ | III           | 112       | 48        | 6         | 1.22   |

|          |          |     |     |    |      |
|----------|----------|-----|-----|----|------|
| $\gamma$ | $\gamma$ | 55  | 260 | 1  | 2.15 |
|          |          | 55  | 334 | 2  | 0.76 |
|          |          | 55  | 335 | 4  | 0.95 |
|          |          | 59  | 334 | 1  | 0.76 |
|          |          | 140 | 163 | 1  | 1.65 |
|          |          | 140 | 222 | 1  | 1.26 |
|          |          | 140 | 245 | 5  | 1.15 |
|          |          | 140 | 263 | 3  | 1.46 |
|          |          | 222 | 245 | 6  | 0.71 |
|          |          | 245 | 260 | 1  | 0.94 |
| I        | I        | 80  | 87  | 8  | 1.49 |
| I        | II       | 73  | 131 | 12 | 0.79 |
|          |          | 73  | 138 | 7  | 0.73 |
|          |          | 107 | 161 | 2  | 1.00 |
|          |          | 107 | 173 | 25 | 1.33 |

**Table S3: Comparative cross-linking of naturally modified and deacetylated/dephosphorylated chloroplast ATP synthase.** The cross-linked protein subunits, the cross-linked residues, the number of obtained spectra and the ratio of naturally modified (d0) versus deacetylated (d4) chloroplast ATP synthase are given.

| Protein 1 | Protein 2 | Residue 1 | Residue 2 | # spectra | d0/d4 |
|-----------|-----------|-----------|-----------|-----------|-------|
| $\alpha$  | $\alpha$  | 378       | 491       | 1         | 2.08  |
| $\alpha$  | beta      | 382       | 495       | 1         | 4.17  |
| $\alpha$  | delta     | 11        | 101       | 1         | 2.77  |
| $\alpha$  | I         | 2         | 125       | 1         | 2.96  |
| $\beta$   | $\beta$   | 18        | 50        | 4         | 5.45  |
|           |           | 359       | 17        | 1         | 0.25  |
|           |           | 359       | 392       | 4         | 5.76  |
| $\delta$  | $\delta$  | 101       | 200       | 1         | 3.86  |
|           |           | 200       | 210       | 1         | 1.88  |
| $\gamma$  | $\gamma$  | 55        | 335       | 3         | 1.20  |
|           |           | 140       | 222       | 2         | 3.17  |
|           |           | 140       | 245       | 1         | 8.23  |
|           |           | 222       | 245       | 2         | 1.77  |
| I         | I         | 80        | 87        | 12        | 3.55  |
|           |           | 87        | 107       | 1         | 1.00  |
| I         | II        | 73        | 131       | 12        | 5.01  |
|           |           | 73        | 138       | 7         | 3.28  |
|           |           | 107       | 161       | 1         | 4.27  |
|           |           | 107       | 173       | 6         | 1.71  |



|          |        |                                     |         |          |         |         |         |        |         |
|----------|--------|-------------------------------------|---------|----------|---------|---------|---------|--------|---------|
| I        | acK135 | TLEQFENYKNETIQFEQQ <b>K</b> AINQVR  |         |          | 3460.93 |         |         | 0.03   | 0.01    |
| II       | acK164 | <b>K</b> ETQLEVEAK                  |         |          | 7.06    |         |         | 12.40  | 4.13    |
|          | acK161 | AEISAALN <b>K</b> MK                |         |          | 30.62   |         |         | 3.16   | 1.05    |
|          | acK135 | TLEQFENY <b>K</b> NETIQFEQQK        | 41.95   | 689.04   | 203.88  | 2.33    | 0.14    | 0.49   | 0.99    |
|          | acK173 | ETQLEVEA <b>K</b> LAEGR             |         |          | 37.14   |         |         | 2.62   | 0.87    |
|          | acK180 | <b>K</b> IEVELQEALGSLEQQKEDTIK      |         |          | 730.67  | 120.73  |         | 0.14   | 0.82    |
|          | acK124 | DASI <b>K</b> EQLSGVK               |         |          | 543.69  | 618.62  |         | 0.18   | 0.16    |
|          | acK131 | EQLSGV <b>K</b> DTSSEVK             |         |          | 4584.63 | 4414.43 |         | 0.02   | 0.02    |
| IV       | acK156 | <b>K</b> GLGYFGK                    |         | 1630.18  | 595.45  |         | 0.06    | 0.17   | 0.08    |
| $\alpha$ | pT181  | TAVAT <b>T</b> DILNQQGQNVICVYVAIGQK |         | 0.66     |         |         | 1.54    |        | 0.51    |
|          | pT183  | TAVATD <b>T</b> ILNQQGQNVICVYVAIGQK | 0.73    |          |         | 1.37    |         |        | 0.46    |
| $\beta$  | pT62   | GRDTAGQPMNV <b>T</b> CEVQQLLGNNR    |         | 134.58   | 25.20   |         | 0.007   | 0.040  | 0.02    |
|          | pT54   | D <b>T</b> AGQPMNVTCEVQQLLGNNR      |         |          | 1245.35 |         |         | 0.0008 | 0.0003  |
| $\gamma$ | pS234  | SDPVIHTLLPL <b>S</b> PK             |         | 9324.88  | 6716.37 |         | 0.0001  | 0.0001 | 0.0001  |
| $\delta$ | pS97   | YASALADVADVTGTLEATN <b>S</b> DVEK   |         | 592.45   |         |         | 0.002   |        | 0.001   |
| I        | pT155  | VFQQALQGALG <b>T</b> LNSCLNNELHLR   | 0.40    | 698.03   | 8.10    | 2.51    | 0.001   | 0.12   | 0.88    |
| II       | pS205  | SLD <b>S</b> QISALSDDIVKK           | 4398.89 | 15209.36 |         | 0.0002  | 0.00007 |        | 0.0001  |
|          | pS208  | SLDSQ <b>I</b> SALSDDIVKK           |         | 43630.02 |         |         | 0.00002 |        | 0.00001 |



## Figures

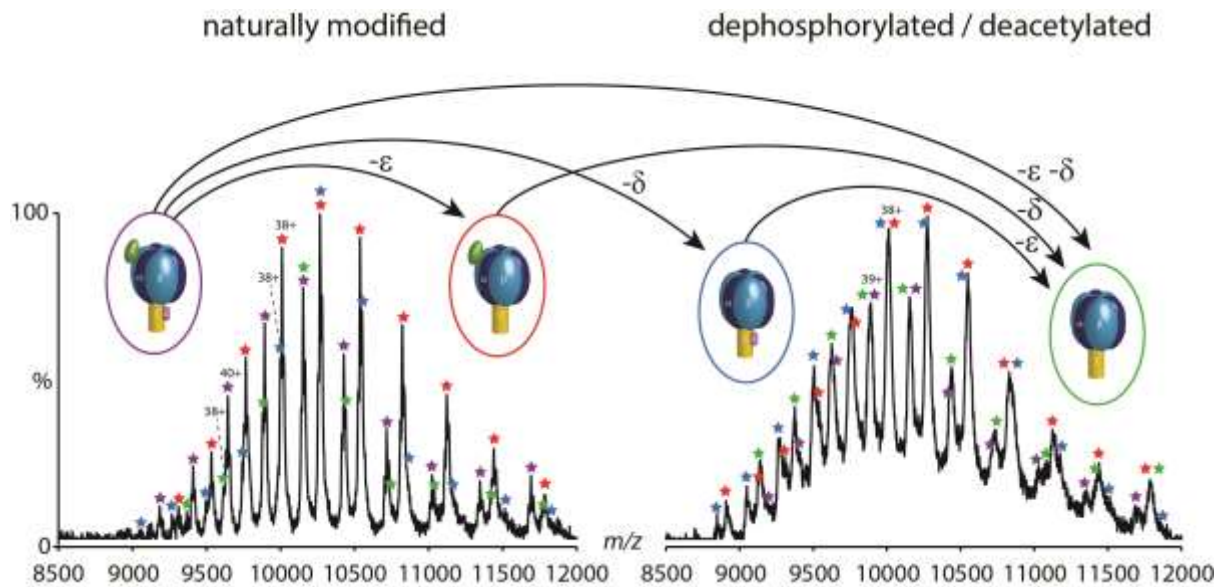

**Figure S1: Simultaneous dephosphorylation and deacetylation.** Spectra of the naturally modified (**lhs**) and the dephosphorylated/deacetylated (**rhs**) cATPase are shown. Four subcomplexes of cATPase were identified.

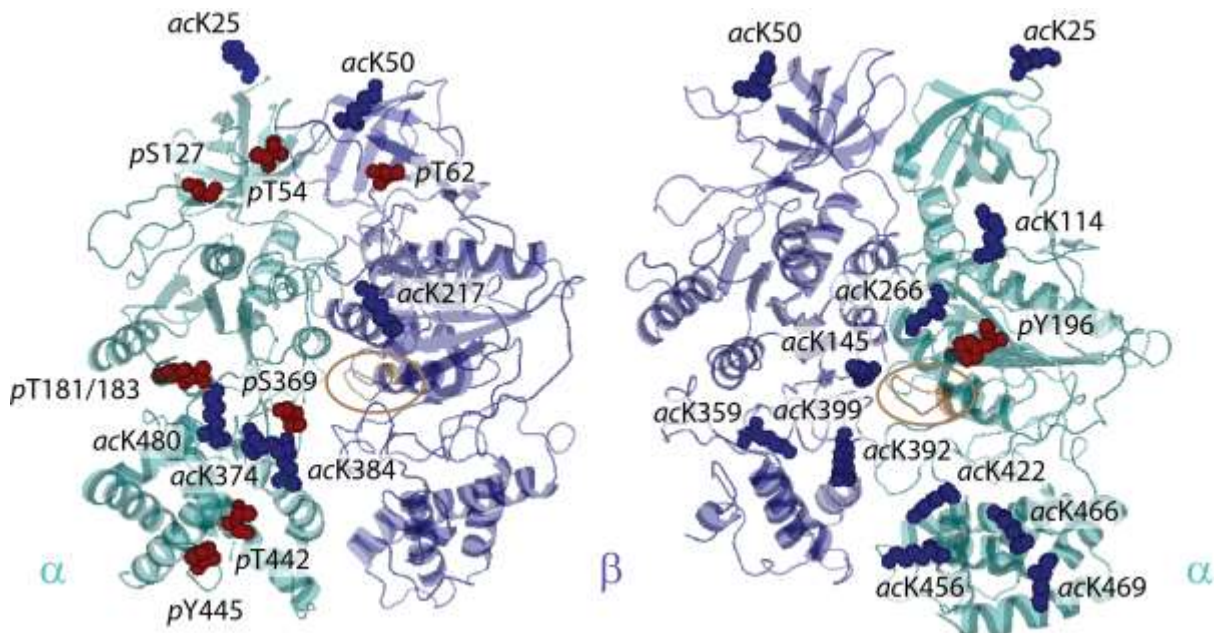

**Figure S2: Phosphorylation and acetylation sites are located at the protein interfaces.** The  $\alpha/\beta$  and  $\beta/\alpha$  interfaces of the cATPase are shown (PDB ID XY). Phosphorylated (red) and acetylated (blue) residues are shown (space fillings). Most phosphorylation sites are located in the  $\alpha/\beta$  interface, while acetylation is more prevalent in the  $\beta/\alpha$  interface.
